# Supplementary material for: Spectroelectrochemical investigation of a dinuclear cobalt porphyrin complex with ionic groups in DMSO †
Source: Royal Society of Chemistry journal article supplement (doi:10.1039/b006619m), 2001-01-01
Supplement: b006619m.doc [file b006619m.doc]

**Synthesis of (5,10,15,20-tetrakis(N-methyl-4'-pyridyl)porphinato)-cobalt(II).**

H2TMPyP(1g, 74 mmol) and ca. 3 equimolar amount of cobalt dichloride were dissolved in 300 mL of N,N-dimethylformamide(DMF). The mixture was heated at 90 oC for 3 hr after the addition of triethylamine to maintain the basisity. The product was dried in vacuo for 12 hr at 50 oC. The cured product was purified by the column chromatography(5cm x 25 cm, Merk basic alumina, methanol) to collect the fraction to monitor the electronic spectrum. The product was dried at 50 oC for 12 hr after concentration.

**Synthesis of (5,10,15,20-tetrakis(4'-sulfonatophenyl)porphinato) cobalt(II) tetra sodium salt.**

The sodium hydroxide was added to an aqueous solution of H2TPPS in order to convert it to the 4-sodium salt form. H2TPPS(4Na) was isolated after the recrystallization in ethanol. H2TPPS(4Na)(1g, 900 mmol) and a 1.1 equimolar amount of cobalt acetate tetrahydrate was dissolved in 300 mL of water. The mixture was heated at 80 oC for 1.5 hr with stirring. The reaction mixture was concentrated after the neutralization of the formed proton by the addition of an equimolar amount of sodium hydroxide.

**Purity of CoTPPS and CoTMPyP**

**Ligand**s

Reagent grade (5,10,15,20-tetrakis(N-methyl-4'-pyridyl)porphine free base(H2TMPyP) and 5,10,15,20-tetrakis(4'-sulfonatophenyl)porphine(H2TPPS) were used as a stertinmaterial. The purity was confirmed by electronic spectra.

H2TMPyP :  max =422 nm( = 2.3 x 105 lmol-1cm-1) in H2O , 445 nm( = x 105 lmol-1cm-1) in 1 N HCl , H2TPPS:  max =435 nm(pH = 4) , 413 nm(pH =6)

# Themogravimetric analysis

The hydration number was determined by themogravimetric measurement.

CoTPPS 4Na x H2O (Found: 11 %),

Calcd: Co(II)TPPS 4Na 12H2O: 1295.05(H2O 16.7%)

Co(II)TPPS 4Na 8H2O: 1223.00(H2O 11.8%)

Co(II)TPPS 4Na 4H2O: 1151.05(H2O 6.2%)

The hydration number was dtermined to be 8(CoTPPS 4Na 8H2O)

CoMPyP MPyP 4*p*-toluenesulfonate xH2O (Found: 6 %),

Calcd: Co(II)MPyP 4*p*-toluenesulfonate: 1419.29(H2O 0.0%)

Co(II)MPyP 4*p*-toluenesulfonate 4H2O: 1491.33(H2O 4.8%)

Co(II)MPyP 4*p*-toluenesulfonate 8H2O: 1563.27(H2O 9.2%)

he hydration number was dtermined to be 4(CoMPyP MPyP 4*p*-toluenesulfonate 4 H2O)

Supplementary Information 2

## Extinction coeficients

Divalent cabalt complex is feasible to oxidized to tribalent state as as a stable speicies.

So, coeficients of trivalent cobalt comples were given in the literatures as high confidence level.

Co(III)TPPS 4Na 8 H2O(x 103 lmol-1cm-1)

Found: =425.8 nm(234), 0.1M H2SO4aq

Literatures:

 =424 nm(270), phosphate buffer; K. Hatano et. al, Bull. Chem. Soc. Jpn, 1981, 54, 413

 =424nm (250), 0.1M HClO4, =1(LiClO4)　aq; P. Neta, J. Phys. Chem, 1981, 85, 3678

 =425nm (215), pH=8 aq ; P. Neta, J. Phys. Chem, 1981, 85, 3678

 =427nm(230), H2O; E. B. Fleischer and S. K. Cheung, JACS, 1976, 98, 8382

CoMPyP MPyP 4*p*-toluenesulfonate 4 H2O( max of Soret band, x103 lmol-1cm-1)

Found:  =433nm(210), 0.1M H2SO4aq

Literatures:

 =433 nm(207), pH 2,  = 0.5aq; R. F. Pasternack, Inorg. Chem, 1976, 15, 643

 =433 nm(214), 0.1M H2SO4  aq; J. H. Ray et. al, Inorg. Chem, 1985, 24, 3777
